1 Full Title - Impact of Lactobacillus GG on weight loss in post-bariatric surgery

2 patients: a randomized, double-blind clinical trial

3 Short Title - Impact of Lactobacillus GG on weight loss in post-bariatric surgery patients

4 Authors: Myra Nasir<sup>1</sup>, Samuel Stone<sup>2</sup>, Ian Mahoney<sup>3</sup>, Justin Chang<sup>4</sup>, Julie Kim<sup>5</sup>, Sajani Shah<sup>6</sup>, Laura A.

5 McDermott<sup>1</sup>, Paola Sebastiani<sup>7</sup>, Hocine Tighiouart<sup>7,8</sup>, David R. Snyderman<sup>1</sup>, Shira Doron<sup>1</sup>

6 Corresponding author: Myra Nasir

7 Email Address: [myranasir1@gmail.com](mailto:myranasir1@gmail.com)

8 Affiliations

9 1. Department of Medicine, Division of Geographic Medicine and Infectious Diseases, Tufts Medical  
10 Center, Tufts University School of Medicine, Boston, MA, USA.

11 2. Department of Medicine, Division of Cardiology, Tufts Medical Center, Boston, MA, USA.

12 3. Department of Medicine, Division of Pulmonary Critical Care and Sleep Medicine, New York  
13 University, New York, NY, USA.

14 4. Department of Surgery, Division of General Surgery, University of Illinois Chicago, Chicago, IL, USA.

15 5. Department of Surgery, Mount Auburn Hospital, Cambridge, MA, USA

16 6. Department of Surgery, Division of Bariatric Surgery, Tufts Medical Center, Boston, MA, USA

17 7. Department of Medicine, Institute for Clinical Research and Health Policy Studies, Tufts Medical  
18 Center, Tufts University School of Medicine, Boston, MA, USA

19 8. Department of Medicine, Tufts Clinical and Translational Science Institute, Tufts University, Boston,  
20 MA, USA.

21

22

23 *Abstract*

24 Introduction and Objectives: There is increasing evidence suggesting the impact of human gut microbiota on  
25 digestion and metabolism. It is hypothesized that the microbiome in obese subjects is more efficient than that in  
26 lean subjects in absorbing energy from food, thus predisposing to weight gain. A transformation in gut  
27 microbiota has been demonstrated in patients who have undergone bariatric surgery which has been positively  
28 associated with post-surgical weight loss. However, there is lack of studies investigating the impact of  
29 probiotics on weight loss in post-bariatric surgery patients. The objectives of our study were to investigate the  
30 impact of a probiotic, Lactobacillus GG (LGG), on weight loss and quality of life in patients who have  
31 undergone bariatric surgery.

32 Methods: The study was registered with ClinicalTrials.gov NCT01870544. Subjects were randomized to receive  
33 either LGG or placebo capsules. Percent total weight loss at their post-operative visits was calculated and  
34 differences between the two groups were tested using a t-test with unequal variances. The effect of LGG on  
35 Gastrointestinal Quality of Life Index (GIQLI) scores was estimated using a mixed model repeated measures  
36 model.

37 Results: The mean rate of change in percent total weight loss at the '30-day' post-operative visit for the placebo  
38 and treatment groups was 0.098 and 0.079 ( $p = 0.41$ ), respectively, whereas that at the '90-day' post-operative  
39 visit was 0.148 and 0.126 ( $p = 0.18$ ), respectively. The difference in GIQLI scores on '30-day' and '90-day'  
40 visits were 0.5 (-7.1, 8.0),  $p=0.91$  and 3.7 (-4.9, 12.3),  $p=0.42$ , respectively. LGG was recovered from the stools  
41 of 3 out of 5 subjects in the treatment group.

42 Conclusion: We did not appreciate a significant difference in the mean rate of weight loss or GIQLI scores  
43 between the groups who received LGG versus placebo. This study demonstrated survival of lactobacillus during  
44 transit through the gastrointestinal tract.

45

46

## 47 *Introduction*

48 Obesity is a major public health problem worldwide. In the United States, 66% of the population is classified as  
49 overweight or obese [1].

50 The ‘microbiome revolution’ has, in the last 20 years, brought our attention to the importance of human gut  
51 microbiota as a factor affecting health and disease [2]. Gut microbiota include a range of microorganisms that  
52 inhabit the gastrointestinal tract and have been implicated in digestion and metabolism, protection from  
53 pathogens, insulin resistance and neurologic functioning [3-7]. Metagenomics and twin studies have revealed  
54 that certain microbial compositions are associated with lean body composition and alteration of these microbial  
55 communities is associated with weight gain and metabolic disease [8,9]. In obese subjects, the flora of the gut  
56 has been found to be less diverse, less rich and to have an increased ratio of Firmicutes to Bacteroidetes as  
57 compared to normal weight individuals [10]. It is hypothesized that the obese microbiome is more efficient than  
58 the lean microbiome in absorbing energy from food, thus predisposing to weight gain [8].

59 Bariatric surgery is the most effective treatment for the achievement of prolonged weight loss and has been  
60 associated with improvement in diabetes and hypertension [11-12]. Studies suggest that the beneficial health  
61 effects of these surgeries are not only explained by procedure-induced food restriction and malabsorption but  
62 also by alterations of neuroendocrine and immune signaling pathways [13]. An increase in Bacteroidetes and  
63 Proteobacteria with a decrease in Firmicutes after bariatric surgery has been demonstrated. When the  
64 Bacteroidetes/Firmicutes ratio after bariatric procedures was used as surrogate marker for the observed changes  
65 in the obese microbiome compared to the lean microbiome, it was positively associated with post-surgical  
66 weight loss [14].

67 *Lactobacillus* strain GG (LGG) is a widely studied probiotic, especially with regards to its influence on  
68 metabolic syndrome. A favorable impact on obesity and diabetes has been demonstrated in mice with diet-  
69 induced obesity showing evidence of improvement in insulin resistance with LGG [15,16].

70 Whereas there is increasing evidence to suggest that use of probiotics is linked with lower inflammatory state  
71 and weight loss, there is a lack of studies investigating the impact of probiotics on weight loss in patients who  
72 have undergone bariatric surgery [17-19].

73 We conducted a pilot trial to investigate the impact of LGG on weight loss in patients who have undergone  
74 bariatric surgery.

## 75 *Methods*

76 This was a randomized, double-blind placebo-controlled pilot trial to investigate whether weight loss and  
77 changes in quality of life differ after bariatric surgery in patients who did and did not receive LGG. The primary  
78 outcome is the rate of change of percent total weight loss. Secondary outcomes are Gastrointestinal Quality of  
79 Life Index (GIQLI) at day of surgery, at 30-day visit and at 90-day visit, adverse event percentages and  
80 recovery of LGG from stool.

## 81 *Study population*

82 Subjects were recruited from Tufts Medical Center in Boston, Massachusetts, USA, from June 24, 2013 to  
83 January 31, 2016, if they were scheduled for elective gastric surgery for weight reduction. Patients were eligible  
84 for the study if they were at least 18 years of age, were evaluated for surgery as outpatients, and had stable  
85 comorbidities. Exclusion criteria included active colitis; recent or planned receipt of radiation or chemotherapy;  
86 being on active immunosuppressive medication; known or suspected allergies to probiotics, lactobacillus, milk  
87 protein, or microcrystalline cellulose, or allergy to 2 or more of the rescue antibiotics that might be used to treat  
88 Lactobacillus infection (ampicillin, clindamycin and moxifloxacin) should that become necessary; and positive  
89 baseline stool culture for LGG.

90 Subjects included in the study were restricted from consuming certain yogurts, however since yogurt is a dietary  
91 staple after bariatric surgery, to improve enrollment after initial slow accrual, the protocol was later amended to  
92 allow for types of yogurt that contained select live cultures that would be expected to have minimal effect on

93 patients' microbiota, as well as yogurt without cultures. The four commercially available yogurts that were  
94 permitted were Yoplait Greek, Breyer's light, Brown Cow Fat Free Greek and Brown Cow Greek.  
95 Study patients undergoing sleeve gastrectomy were initially planned to be excluded from the study. However,  
96 sleeve gastrectomy rapidly became the preferred weight-loss surgery which resulted in significantly fewer  
97 gastric bypass surgeries at Tufts Medical Center than they were at the time of initial study design. Therefore, in  
98 order to improve enrollment, the study design was amended to included patients undergoing sleeve gastrectomy,  
99 in addition to gastric bypass surgery.

## 101 Trial Design and Oversight

102 The trial design is parallel with an allocation ratio of 1:1. Sample size analysis was not conducted since this was  
103 a pilot study to inform a future larger scale trial.

104 The random allocation was done by the statistician using a random number generator with the allocation  
105 sequence provided directly to the research pharmacy who labeled the pills with the subject names but without  
106 identification of the compound. Study staff, which included investigators and research assistants, enrolled  
107 subjects and went to the research pharmacy to pick up the study compound already labeled for the subject.  
108 Thus, investigators, study staff and participants were blinded, as were the clinical staff caring for these subjects.  
109 Subjects were randomized to receive either probiotic capsules of LGG ( $1 \times 10^{10}$  organisms per capsule) or  
110 identical appearing placebo capsules provided by Martek, manufactured by Chr Hansen, Inc., to be taken twice  
111 daily for 44 days, beginning 14 days before surgery. Pill bottles contained 100 capsules. Capsules were  
112 collected from each subject prior to initiation of the course and at study completion. One capsule from each  
113 time period was cultured to confirm viability of the organism and organism counts. Ten extra capsules were  
114 provided in case of loss of capsules. Remaining capsules were counted at the end of the study period to assess  
115 adherence. Stool samples were obtained at baseline (2-4 weeks before surgery), on the day of surgery and at  
116 '30-day' and '90-day' post-operative visits to assess for the presence of colonization by LGG.

117 To monitor for adverse events, subjects completed questionnaires about the presence or absence of certain  
118 symptoms before and after they began taking the study compound. These questionnaires were completed at the  
119 first surgeon visit, first pre-operative visit, and day of surgery in order to establish a baseline, then at the first  
120 four weekly post-operative telephone check-ins, '30-day' post-operative visit and '90-day' post-operative visit.

121 All subjects received routine pre-operative prophylactic antibiotics to prevent surgical site infection. One  
122 subject in the placebo group was receiving azithromycin pre-operatively for suspected bacterial infection and  
123 continued it for several days after surgery.

124 The study was registered with ClinicalTrials.gov NCT01870544, and was approved by the Tufts Medical Center  
125 Institutional Review Board. A written informed consent was taken from all subjects. CONSORT reporting  
126 guidelines were used (S1 CONSORT Checklist) [20].

#### 127 Data collection

128 Demographic information, history of chronic diseases, and medications were collected at screening. Participants  
129 were asked to complete the validated GIQLI questionnaire at the pre-operative visit, on the day of surgery, and  
130 at the post-operative visits closest to 30 and 90 days after surgery [21]. Study weight measurements were taken  
131 at the preoperative visit, the day of surgery, and at the visits closest to 30 and 90 days after surgery. Since these  
132 visits did not necessarily occur on post-op days 30 and 90, we refer to them throughout this manuscript as the  
133 '30-day' and '90-day' visits in quotation marks. Weights were also extracted from the electronic medical record  
134 when available from visits not part of the study.

#### 135 Statistical analysis of clinical outcomes

136 Compared to other metrics such as excess weight loss and change in body mass index, percent total weight loss  
137 (%TWL) has been found to have the least variability when stratified by preoperative patient characteristics, and  
138 therefore is the metric used in this study [22]. Subject weights were measured during post-operative visits.

139 Percent total weight loss at X days (%TWL\_X) was calculated as (weight at surgery – weight at visit)/ weight at

140 surgery  $\times X/(\text{delta day})$ , where delta day was the difference in days between the date of surgery and the date of  
141 visit. Differences in %TWL\_X between the two groups were tested using a t-test with unequal variances.

## 142 Sample collection

143 Subjects were given stool collection kits consisting of a toilet hat, gloves, tongue depressors, specimen cups and  
144 paper bags and asked to produce and save a stool sample in their freezer within 24 hours of their appointment  
145 date and to bring the sample to their scheduled visit. Samples were then aliquoted and frozen at  $-80^{\circ}\text{C}$ .

## 146 Isolation of LGG from Capsule and Stool samples

147 Stool samples and capsules were serially diluted and plated in duplicate onto Lactobacilli selective agar (BBL)  
148 supplemented with tomato juice and glacial acetic acid. Plates were incubated for 48 hours in an anaerobic  
149 chamber (5%CO<sub>2</sub>, 10%H<sub>2</sub>, 85% N<sub>2</sub>) at  $35 \pm 2^{\circ}\text{C}$  and were then observed for characteristic growth and colonial  
150 morphology. Presumptive LGG colonies, appearing as white and creamy with a distinct buttery smell, were  
151 enumerated. The palisading appearance of LGG colonies on Gram stain was used to distinguish it from other  
152 Lactobacillus species. All strains presumptively identified were run through the APIZYM® (Biomerieux), an  
153 identification kit that differentiates between the Lactobacillus species on the basis of enzymatic reactions.  
154 Isolates that were consistent with LGG by APIZYM® were additionally run through the API CH-50 ®  
155 (Biomerieux) system, which differentiates between different species of Lactobacillus on the basis of  
156 carbohydrate fermentation.

## 157 Statistical analysis of Gastrointestinal Quality of Life Index (GIQLI) scores

158 The effect of LGG on the continuous GIQLI scores was estimated using a mixed model repeated measures  
159 model. The outcome for each subject consisted of all follow-up measurements including the baseline  
160 measurement. All variables included in the model were treated as fixed effects and included categorical time,  
161 randomization and their interaction. We performed sensitivity analyses to account for missing data in follow-up

162 using pattern mixture models (PMM). We used the core functionality available in SAS PROC MI and  
163 MIANALYZE procedures to implement two types of PMM: standard PMM and control-based PMM.

164

165

## 166 *Results*

167 A total of 37 bariatric surgery candidates were recruited and followed up through April 2016. Of these, 15  
168 subjects withdrew prior to randomization, 3 after randomization and before study drug was administered and 1  
169 who received study drug but was lost to follow up, with 18 subjects completing follow-up (Figure 1). Ten  
170 subjects received oral placebo and 8 received oral LGG. Table 1 compares the characteristics of subjects by  
171 study group. The median age of the placebo group and the treatment group was 47.5 and 46.5, respectively. Out  
172 of 18 subjects, 12 were female, comprising 60% of the placebo group and 75% of the treatment group. Of those  
173 who received LGG, compliance was variable and ranged between 0 and 19 doses missed. Baseline median body  
174 mass index (BMI) and excess weight of the placebo group (42.44 and 13.02 lbs, respectively) were comparable  
175 to the baseline median BMI and excess weight of the treatment group (41.16 and 102.28 lbs). The placebo  
176 group, as compared to the treatment group, had a higher percentage of patients with diabetes (40% vs. 25%,  
177 respectively) and a lower percentage of patients with hyperlipidemia (20% vs. 25%, respectively). Most  
178 subjects underwent sleeve gastrectomy (70% and 75% for placebo and treatment groups, respectively) while the  
179 rest underwent roux-en-y gastric bypass.

180 At baseline, mean (SD) GIQLI scores for treatment and placebo groups were 59.0 (6.1) and 59.4  
181 (7.2) respectively. On the day of surgery, GIQLI score was 61.1 (6.3) for the treatment group as  
182 compared to 57.4 (9.2) for the placebo group with a mean difference (95%CI) of 3.7 (-3.8, 11.2),  
183  $p=0.35$ . At the '30-day' post-operative visit, GIQLI score was 55.1 (8.5) for the treatment group as compared



184 to 55.5 (4.0) for the placebo group with a difference of 0.5 (-7.1, 8.0), p=0.91. At the ‘90-day’ post-operative  
 185 visit GIQLI score was 60.7 (4.9) for the treatment group as compared to 56.5 (6.8) for the placebo  
 186 group with a difference of 3.7 (-4.9, 12.3), p=0.42.

187  
 188 Figure 1. Flowchart of subject selection

189 RYGB: Roux-en-y gastric bypass

190 Table 1: Characteristics of the study population

|                                   | N = 10                  | N = 8                   |
|-----------------------------------|-------------------------|-------------------------|
| Characteristic                    | Placebo                 | Treatment               |
| Age, median (IQR), y              | 47.5 (40.75 – 49.75)    | 46.5 (40.0 – 53.0)      |
| Female, No. (%)                   | 6 (60%)                 | 6 (75%)                 |
| BMI, median (IQR)                 | 42.44 (41.52 – 45.80)   | 41.16 (40.14 – 42.96)   |
| Diabetes, No. (%)                 | 4 (40%)                 | 2 (25%)                 |
| Hyperlipidemia, No. (%)           | 2 (20%)                 | 2 (25%)                 |
| Excess Weight, median (IQR), lbs. | 103.02 (99.79 – 127.13) | 102.28 (86.60 – 120.54) |
| Quality of Life score, mean (SD)  | 59.0 (6.1)              | 59.4 (7.2)              |
| Surgery Type                      |                         |                         |
| Roux-en-y gastric bypass, No. (%) | 3 (30%)                 | 2 (25%)                 |
| Sleeve gastrectomy, No. (%)       | 7 (70%)                 | 6 (75%)                 |

191  
 192 The mean time between surgery and the ‘30-day’ post-operative visit for the treatment and placebo groups was  
 193 34 and 54 days, with a median of 38 and 48 days, respectively. The mean time between surgery and the ‘90-  
 194 day’ post-operative visit for the treatment and placebo groups was 105 and 125 days, with a median of 107 and  
 195 111 days, respectively. The mean rate of change in percent of total weight loss (%TWL) at the ‘30-day’ post-

196 operative visit for the placebo and treatment groups was 0.098 and 0.079 ( $p = 0.41$ ), respectively, whereas that  
197 at the ‘90-day’ post-operative visit was 0.148 and 0.126 ( $p = 0.18$ ), respectively.

198 LGG was not recovered from any stool samples from subjects belonging to the placebo group. Among subjects  
199 in the treatment group, no samples were successfully obtained after completion of the course of treatment. All  
200 samples were taken during the treatment course. Stool samples were collected from only 5 of the 8 subjects in  
201 the treatment group after the start of the course of treatment. Of the 5, LGG was recovered from the stool  
202 samples of 3 subjects. One of the subjects from whom LGG was not recovered was later found to have missed  
203 19 doses, and the other 4 doses.

204 The most common adverse events experienced by the study and placebo groups while taking the study  
205 compound were increased frequency of bowel movements, loss in appetite, flatulence, constipation, rumbling,  
206 looser stools, and abdominal fullness (Table 22).

207 Table 22: Adverse events reported by subjects while taking study compound

208

| Adverse events                         | Study group | Placebo group |
|----------------------------------------|-------------|---------------|
| Increased frequency of bowel movements | 6           | 8             |
| Loss in appetite                       | 6           | 7             |
| Flatulence                             | 6           | 7             |
| Constipation                           | 7           | 5             |
| Rumbling                               | 3           | 7             |

|                              |   |   |
|------------------------------|---|---|
| Looser stools                | 5 | 6 |
| Abdominal fullness           | 5 | 6 |
| Burping/belching             | 4 | 6 |
| Abdominal pain               | 4 | 2 |
| Bloating                     | 3 | 2 |
| Nausea                       | 3 | 2 |
| Urgent bowel movements       | 2 | 3 |
| Trouble swallowing food      | 1 | 3 |
| Other illnesses              | 3 | 1 |
| Heartburn                    | 0 | 3 |
| Fevers/chills                | 1 | 2 |
| Blood in stool               | 2 | 1 |
| Hospitalization              | 2 | 0 |
| Increased gas                | 1 | 1 |
| Fluid coming up in the mouth | 0 | 1 |

209

210

211 Discussion

212 Growing evidence supports that weight-loss interventions, whether dietary or surgical, lead to changes in the

213 composition of the gastrointestinal microbiome [23]. However, there are conflicting data regarding the impact

214 of probiotics on weight loss. Whereas Kadooka et al demonstrated a significant decrease in weight and body fat

215 in subjects who received fermented milk with lactobacillus compared to a control group [24], a meta-analysis  
216 by Mohammadi et al of 9 randomized controlled trials including 410 subjects showed no significant difference  
217 in BMI or percentage of excess weight loss between the probiotic and control groups [25].

218 In our pilot study of patients who underwent bariatric surgery, we did not appreciate a clinical or statistically  
219 significant difference in the mean rate of weight loss between the groups who received LGG versus placebo.  
220 Our study findings are in keeping with results demonstrated by a systematic review and meta-analysis of 5  
221 randomized controlled trials including a total of 279 patients after bariatric surgery in which no significant  
222 difference in percent excess weight loss at 3 months, change in BMI, waist circumference change or fat mass  
223 change was noted between the probiotic and placebo groups [26]. However, it should be noted that if there were  
224 some minor impact of oral probiotics on weight loss, this may be masked by the substantial effect of bariatric  
225 surgery on weight loss, resulting in no measurable difference between the two groups.

226 This is the first study to our knowledge to evaluate whether probiotics can be recovered in the stool of patients  
227 who have undergone bariatric surgery. To exert its beneficial properties, probiotics must survive during their  
228 transit through the low pH environment of the stomach and lytic enzymes present in the small intestine. In our  
229 study, LGG was recovered from 3 of 5 subjects in the treatment group, demonstrating survival, though  
230 inconsistent, of the lactobacillus during transit through the gastrointestinal tract. Several factors may have  
231 contributed to the lack of recovery of LGG from 2 subjects in the treatment group who were still in the  
232 treatment phase, including adherence, the constituents of the subjects' diet which can affect survival and growth  
233 of the bacteria, the stability of the culture and size of the inoculum which affect the survival of probiotic  
234 bacteria.

235 There was no significant difference in the GIQLI scores within the follow-up period, between the study and  
236 placebo groups.

237 In our pilot study of patients undergoing bariatric surgery, LGG was found to be safe. Adverse event rates were  
238 similar in the two groups, and consistent with what would be expected in patients who have undergone  
239 gastrointestinal surgery.

240 Our study had several limitations. It was a pilot and therefore not intended to be fully powered to detect  
241 statistically significant differences in outcomes between groups. Though the follow-up outpatient visits were  
242 intended to be at 1- and 3- months post-surgery, there was significant variability in the number of days after  
243 surgery at which subjects were evaluated. The 3-month duration of follow-up may not have been long enough to  
244 demonstrate a clinically significant difference in weight loss or quality of life scores between the two groups.

245

## 246 REFERENCES

247

- 248 1. Wang Y, Beydoun MA, Liang L, Caballero B, Kumanyika SK. Will all Americans become overweight or  
249 obese? Estimating the progression and cost of the US obesity epidemic. *Obesity*. 2008.  
250 doi:10.1038/oby.2008.351
- 251 2. Petersen JM, Osvatic J. Microbiomes In Natura : Importance of Invertebrates in Understanding the  
252 Natural Variety of Animal-Microbe Interactions . *mSystems*. 2018. doi:10.1128/msystems.00179-17
- 253 3. Rothschild D, Weissbrod O, Barkan E, Kurilshikov A, Korem T, Zeevi D, et al. Environment dominates  
254 over host genetics in shaping human gut microbiota. *Nature*. 2018. doi:10.1038/nature25973
- 255 4. Mills S, Stanton C, Lane JA, Smith GJ, Ross RP. Precision nutrition and the microbiome, part I: Current  
256 state of the science. *Nutrients*. 2019. doi:10.3390/nu11040923
- 257 5. Kelly CJ, Zheng L, Campbell EL, Saeedi B, Scholz C, Bayless A, et al. Crosstalk between microbiota-  
258 derived short-chain fatty acids and intestinal epithelial HIF augments tissue barrier function. *Cell Host*  
259 *Microbe*. 2015. doi:10.1016/j.chom.2015.03.005

- 260 6. Zheng P, Zeng B, Liu M, Chen J, Pan J, Han Yu, et al. The gut microbiome from patients with  
261 schizophrenia modulates the glutamate-glutamine-GABA cycle and schizophrenia-relevant behaviors in  
262 mice. *Sci Adv*. 2019. doi:10.1126/sciadv.aau8317
- 263 7. Kelly JR, Kennedy PJ, Cryan JF, Dinan TG, Clarke G, Hyland NP. Breaking down the barriers: The gut  
264 microbiome, intestinal permeability and stress-related psychiatric disorders. *Front Cell Neurosci*. 2015.  
265 doi:10.3389/fncel.2015.00392
- 266 8. Turnbaugh PJ, Gordon JI. The core gut microbiome, energy balance and obesity. In: *Journal of*  
267 *Physiology*. ; 2009. doi:10.1113/jphysiol.2009.174136
- 268 9. Turnbaugh PJ, Hamady M, Yatsunenko T, Cantarel B, Duncan A, Ley R, et al. A core gut microbiome in  
269 obese and lean twins. *Nature*. 2009. doi:10.1038/nature07540
- 270 10. Ley RE, Bäckhed F, Turnbaugh P, Lozupone CA, Knight RD, Gordon JI. Obesity alters gut microbial  
271 ecology. *Proc Natl Acad Sci U S A*. 2005. doi:10.1073/pnas.0504978102
- 272 11. Tadross JA, Le Roux CW. The mechanisms of weight loss after bariatric surgery. *Int J Obes*. 2009.  
273 doi:10.1038/ijo.2009.14
- 274 12. Federico A, Dallio M, Tolone S, Gravina AG, Patrone V, Romano M, et al. Gastrointestinal hormones,  
275 intestinal microbiota and metabolic homeostasis in obese patients: Effect of bariatric surgery. *In Vivo*;  
276 2016; 30(3), 321–330.
- 277 13. Ionut V, Bergman RN. Mechanisms responsible for excess weight loss after bariatric surgery. *J Diabetes*  
278 *Sci Technol*. 2011. doi:10.1177/193229681100500536
- 279 14. Luijten JCHBM, Vugts G, Nieuwenhuijzen GAP, Luyer MDP. The Importance of the Microbiome in  
280 Bariatric Surgery: a Systematic Review. *Obes Surg*. 2019. doi:10.1007/s11695-019-03863-y
- 281 15. Ji Y, Park S, Park H, Hwang E, Shin H, Pot B, et al. Modulation of active gut microbiota by *Lactobacillus*  
282 *rhamnosus* GG in a diet induced obesity murine model. *Front Microbiol*. 2018.

- 283       doi:10.3389/fmicb.2018.00710
- 284 16. Kim SW, Park KY, Kim B, Kim E, Hyun CK. Lactobacillus rhamnosus GG improves insulin sensitivity  
285 and reduces adiposity in high-fat diet-fed mice through enhancement of adiponectin production. *Biochem*  
286 *Biophys Res Commun*. 2013. doi:10.1016/j.bbrc.2012.12.121
- 287 17. Hegazy SK, El-Bedewy MM. Effect of probiotics on pro-inflammatory cytokines and NF-kb activation  
288 in ulcerative colitis. *World J Gastroenterol*. 2010. doi:10.3748/wjg.v16.i33.4145
- 289 18. Ashraf R, Shah NP. Immune System Stimulation by Probiotic Microorganisms. *Crit Rev Food Sci Nutr*.  
290 2014. doi:10.1080/10408398.2011.619671
- 291 19. Dror T, Dickstein Y, Dubourg G, Paul M. Microbiota manipulation for weight change. *Microb Pathog*.  
292 2017. doi:10.1016/j.micpath.2016.01.002
- 293 20. Schulz KF, Altman DG, Moher D, for the CONSORT Group. CONSORT 2010 Statement: updated  
294 guidelines for reporting parallel group randomised trials
- 295 21. Eypasch E, Williams JI, Wood-Dauphinee S, Ure BM, Schmulling C, Neugebauer E, et al.  
296 Gastrointestinal Quality of Life Index: Development, validation and application of a new instrument. *Br J*  
297 *Surg*. 1995. doi:10.1002/bjs.1800820229
- 298 22. Grover BT, Morell MC, Kothari SN, Borgert AJ, Kallies KJ, Baker MT. Defining Weight Loss After  
299 Bariatric Surgery: a Call for Standardization. *Obes Surg*. 2019. doi:10.1007/s11695-019-04022-z
- 300 23. Seganfredo FB, Blume CA, Moehlecke M, Giongo A, Casagrande DS, Spolidoro JVN, et al. Weight-loss  
301 interventions and gut microbiota changes in overweight and obese patients: a systematic review. *Obes*  
302 *Rev*. 2017. doi:10.1111/obr.12541
- 303 24. Kadooka Y, Sato M, Ogawa A, Miyoshi M, Uenishi H, Ogawa H, et al. Effect of Lactobacillus gasseri  
304 SBT2055 in fermented milk on abdominal adiposity in adults in a randomised controlled trial. *Br J Nutr*.  
305 2013. doi:10.1017/S0007114513001037

- 306 25. Mohammadi H, Ghavami A, Hadi A, Askari G, Symonds M, Miraghajani M. Effects of pro-/synbiotic  
307 supplementation on anthropometric and metabolic indices in overweight or obese children and  
308 adolescents: A systematic review and meta-analysis. *Complement Ther Med*. 2019.  
309 doi:10.1016/j.ctim.2019.05.008
- 310 26. Daghmouri MA, Chaouch MA, Yang W, Akremi S, Jaoua H, Fadhel KB, et al. Probiotics in bariatric  
311 surgery ensure greater lipids and glycemic profile with no effect on anthropometric measurements and  
312 inflammatory markers: A systematic review and meta-analysis of RCT. *Surg Open Dig Adv*.  
313 2022;7:100061. doi:10.1016/j.soda.2022.100061

314

### 315 Funding

316 This study was supported by a grant from Tufts University Collaborates and NIH CTSA grant UM1TR004383  
317 and UM1TR004398 awarded to SD, JK and DS.

318 S1 CONSORT Checklist

319 S2 Appendix. Study Protocol



medRxiv preprint doi: <https://doi.org/10.1101/2024.03.24.24304808>; this version posted March 27, 2024. The copyright holder for this preprint (which was not certified by peer review) is the author/funder, who has granted medRxiv a license to display the preprint in perpetuity. It is made available under a [CC-BY 4.0 International license](https://creativecommons.org/licenses/by/4.0/).

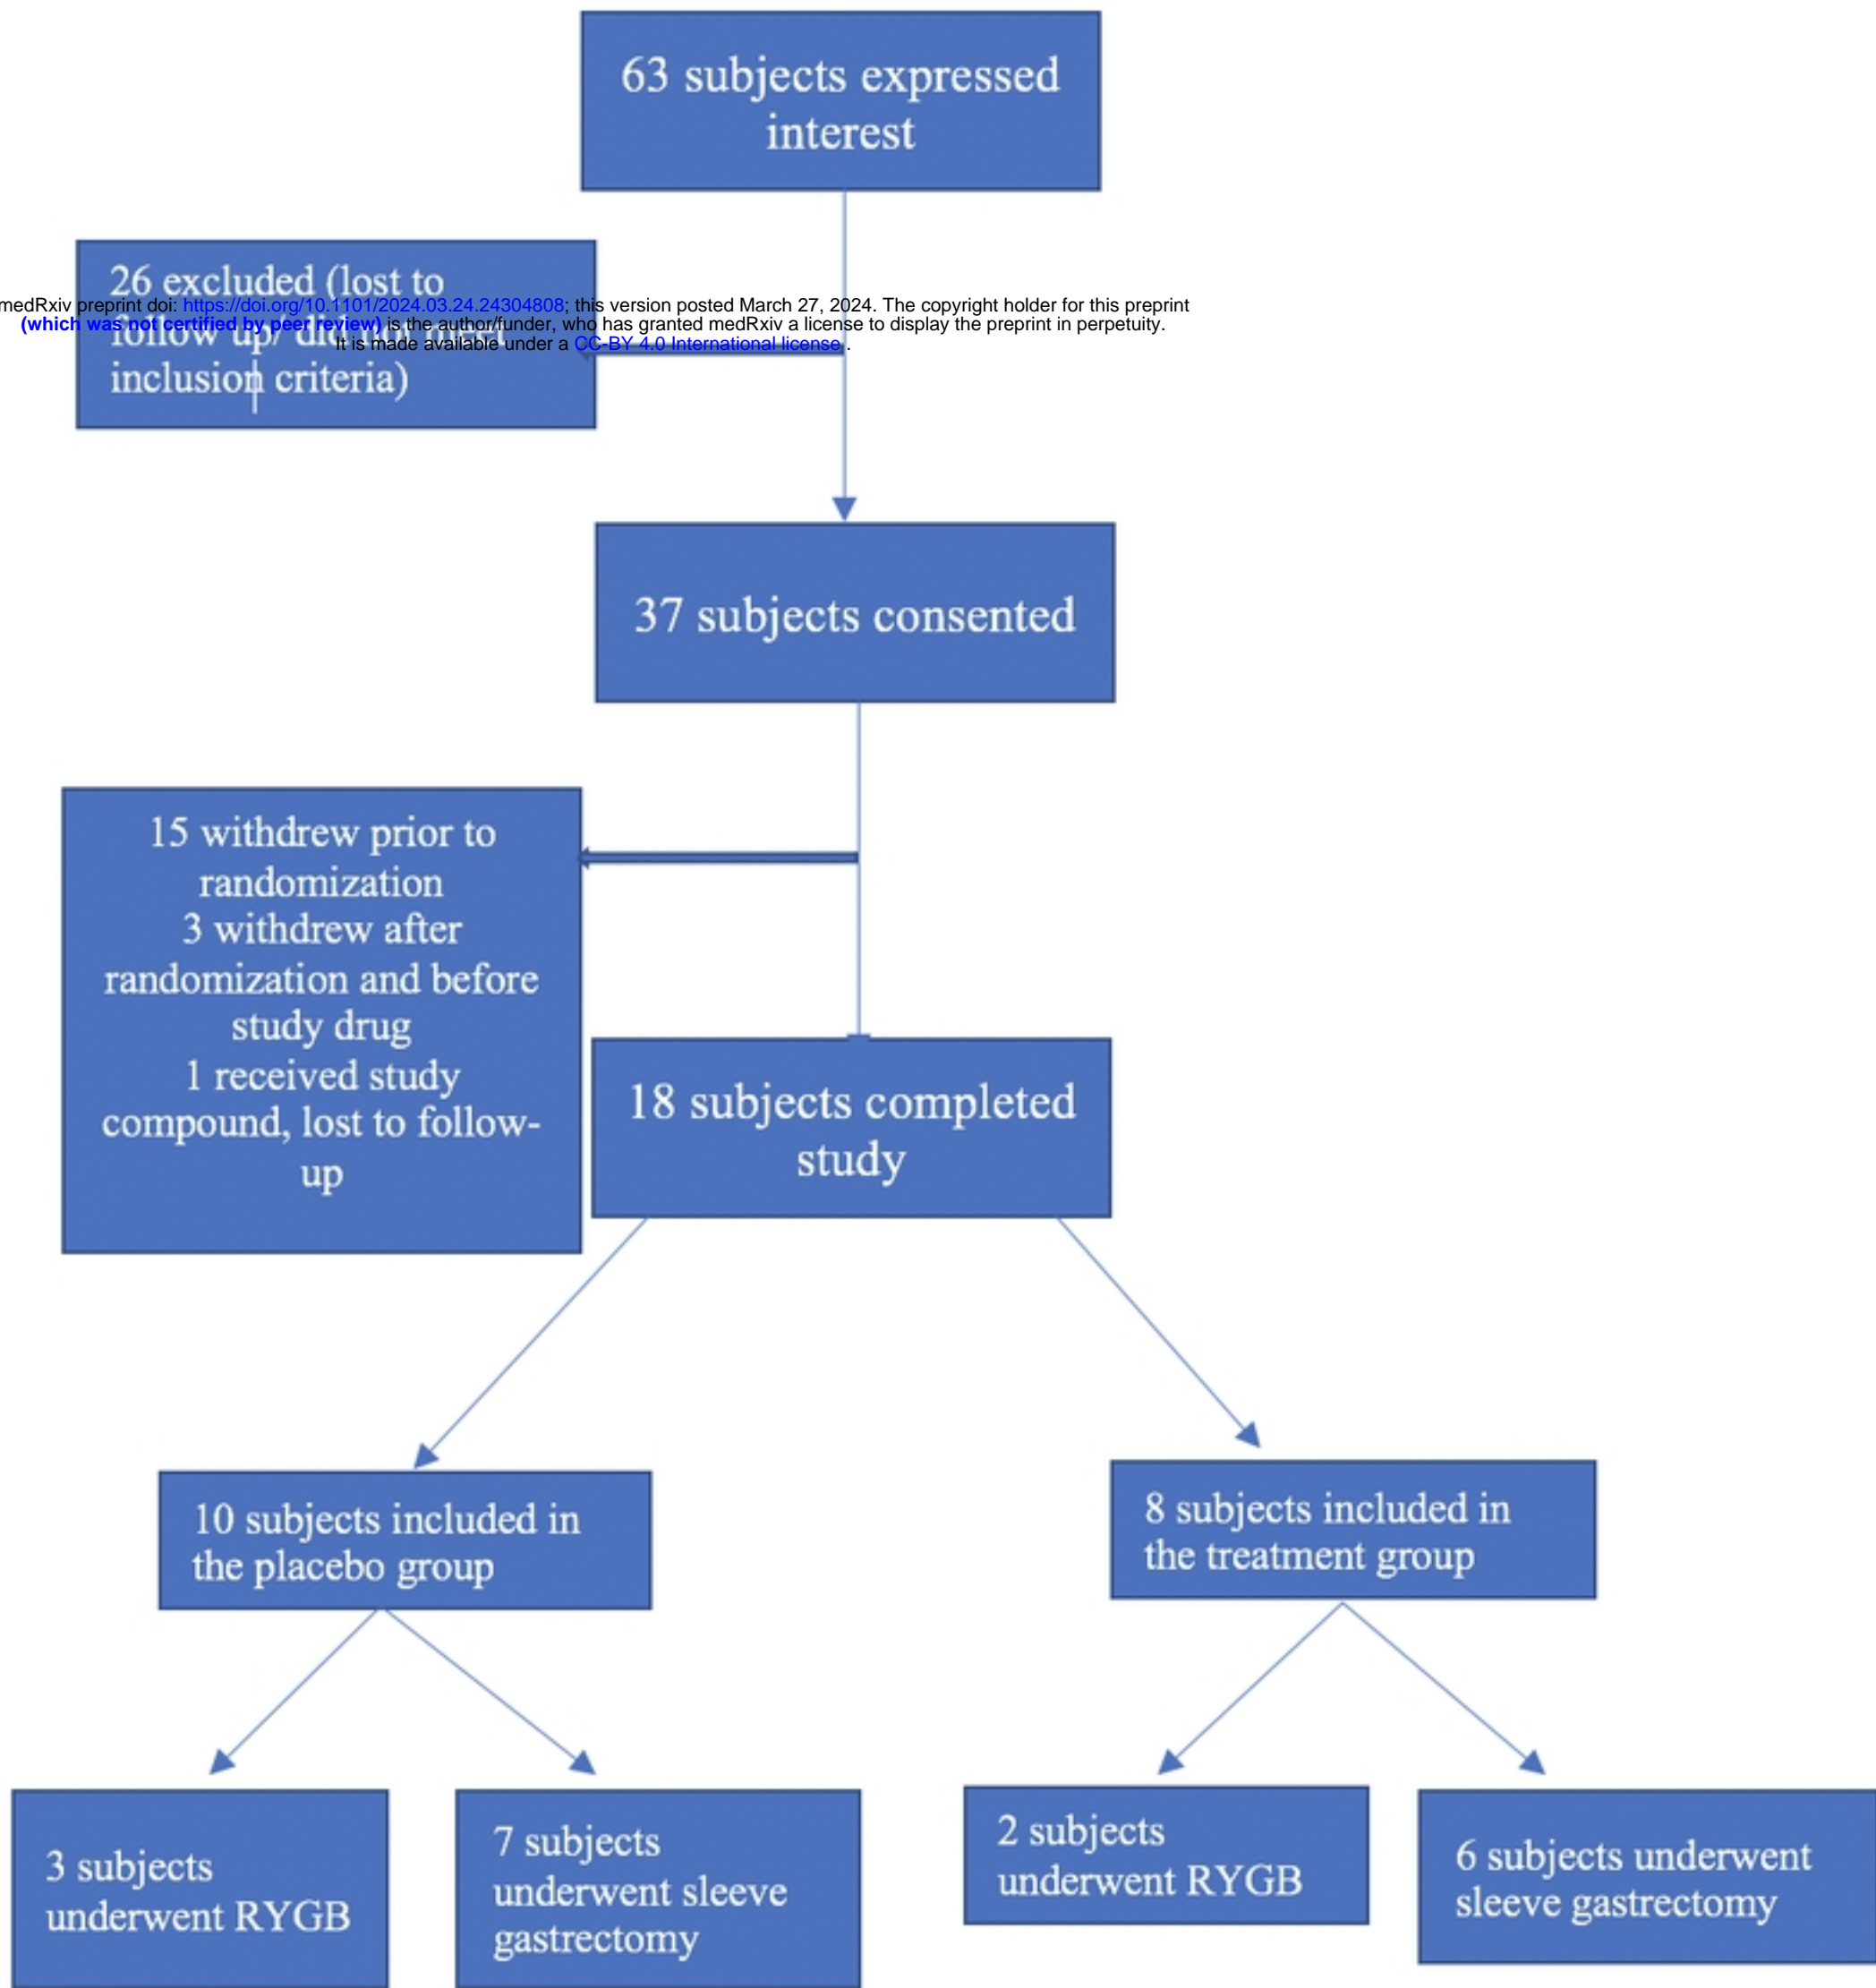

Figure
